# Supplementary material
Source: Springer Nature journal article supplement (https://www.springermedizin.de/resource/supplementary/13256_2013_2537_MOESM1_ESM.pdf/9649898)

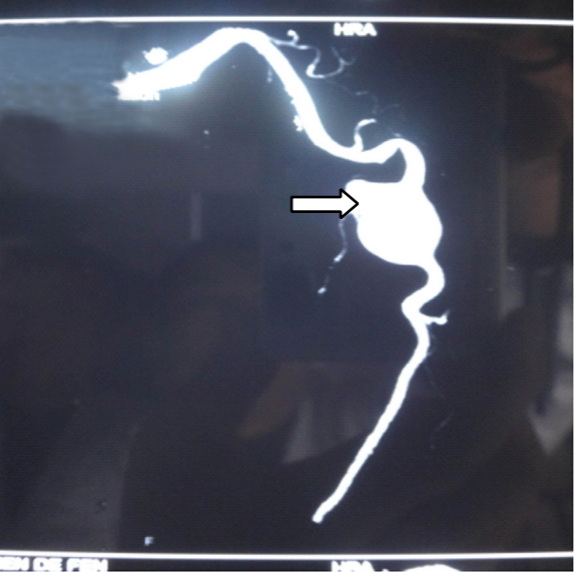

Supplement: MOESM1 [file 9649898]
